# Supplementary material for: Nanorod-assembled Co3O4 hexapods with enhanced electrochemical performance for lithium-ion batteries
Source: Royal Society of Chemistry journal article supplement (doi:10.1039/c2jm35617a), 2012-01-01
Supplement: c2jm35617a.pdf [file c2jm35617a.pdf]

## SUPPORTING INFORMATION

### Nanorod-assembled $\text{Co}_3\text{O}_4$ hexapods with enhanced electrochemical performance for lithium-ion batteries

Liming Wang, Bin Liu, Sihan Ran, Hongtao Huang, Xianfu Wang, Bo Liang, Di Chen, \* and Guozhen Shen\*

Wuhan National Laboratory for Optoelectronics (WNLO), Huazhong University of Science and Technology (HUST), Wuhan, 430074, China. Fax: (+86-27-87792225)

E-mail: [gzshen@mail.hust.edu.cn](mailto:gzshen@mail.hust.edu.cn); [dichen@mail.hust.edu.cn](mailto:dichen@mail.hust.edu.cn).

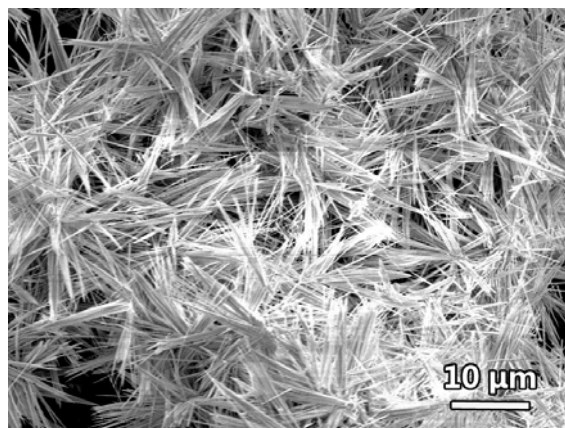

**Figure S1** SEM image of the as-prepared nanorod-bunch-like  $\text{Co}(\text{CO}_3)_{0.35}\text{Cl}_{0.20}(\text{OH})_{1.10} \cdot 1.74\text{H}_2\text{O}$  architecture without adding  $\text{NH}_4\text{F}$ .

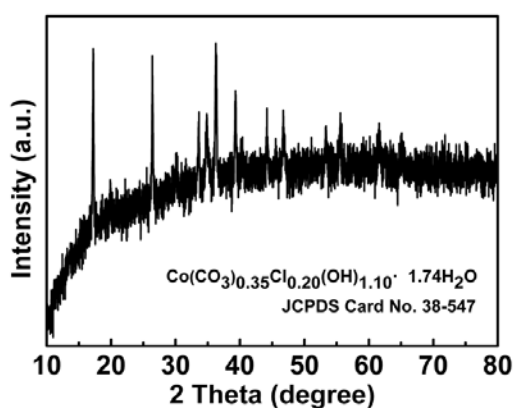

**Figure S2** XRD pattern of the as-prepared  $\text{Co}(\text{CO}_3)_{0.35}\text{Cl}_{0.20}(\text{OH})_{1.10} \cdot 1.74\text{H}_2\text{O}$  sample without adding  $\text{NH}_4\text{F}$ .
